# Supplementary material
Source: MDPI journal article supplement (https://www.mdpi.com/2072-4292/11/1/93)
Supplement: s1 [file s1]

## Supplementary Materials

Table S1. Floristic survey and sampling strategies for the four (1–4) sampling campaigns used in this study.

|                                  | 1 <sup>A</sup>                                                                                                    | 2 <sup>A</sup>                                                                                                                                                                                                        | 3                                                                                                                                                                                                                     | 4                                                                                                                        |
|----------------------------------|-------------------------------------------------------------------------------------------------------------------|-----------------------------------------------------------------------------------------------------------------------------------------------------------------------------------------------------------------------|-----------------------------------------------------------------------------------------------------------------------------------------------------------------------------------------------------------------------|--------------------------------------------------------------------------------------------------------------------------|
| Forest type <sup>A</sup>         | Eucalypt ( <i>n</i> = 6),<br>Ecotone ( <i>n</i> = 6),<br>Rainforest ( <i>n</i> = 6)                               | Eucalypt ( <i>n</i> = 23),<br>Ecotone ( <i>n</i> = 6),<br>Rainforest ( <i>n</i> = 11)                                                                                                                                 | Eucalypt ( <i>n</i> = 3)                                                                                                                                                                                              | Eucalypt ( <i>n</i> = 3),<br>Ecotone ( <i>n</i> = 2),<br>Rainforest ( <i>n</i> = 5)                                      |
| Site dimensions                  | 30 m × 30 m (0.09 ha plot size<br>adjusted for slope)                                                             | 20 m × 20 m (~0.04 ha)                                                                                                                                                                                                | 20 m × 20 m (~0.04 ha)                                                                                                                                                                                                | 10 m × 40 m (~0.04 ha, shortest<br>side parallel to slope)                                                               |
| Understorey vegetation<br>survey | 20 m × 20 m plot,<br>point intercept every 1 m on<br>transects located every 2 m<br>(total 210 points)            | 20 m × 20 m plot,<br>point intercept every 1 m on<br>transects located every 2 m<br>(total 210 points)                                                                                                                | 20 m × 20 m plot,<br>point intercept every 1 m on<br>transects located every 2 m<br>(total 210 points)                                                                                                                | 10 m × 40 m plot,<br>point intercept every 1 m on<br>transects located every 2 m<br>(total 205 points)                   |
| Vegetation Structure             | All trees ≥ 10 cm measured for<br>DBH and height, counts and<br>also average height within 2 <<br>10 cm DBH class | Counts and representative<br>trees measured for DBH and<br>height for 2 < 10, 10 < 20 and<br>20 < 30 cm DBH classes.<br>Larger trees were counted in<br>DBH classes adapted to the<br>size distribution of that plot. | Counts and representative trees<br>measured for DBH and height<br>for 2 < 10, 10 < 20 and 20 < 30 cm<br>DBH classes. Larger trees were<br>counted in DBH classes adapted<br>to the size distribution of that<br>plot. | All trees ≥ 20 cm measured,<br>counts and also maximum and<br>minimum height within 2 < 10<br>and 10 < 20 cm DBH classes |
| Date: Vegetation structure       | October to December 2012                                                                                          | October to December 2012                                                                                                                                                                                              | September to December 2013                                                                                                                                                                                            | March to June 2014                                                                                                       |
| Date: Understorey vegetation     | September to December 2013                                                                                        | September to December 2013                                                                                                                                                                                            | September to December 2013                                                                                                                                                                                            | October 2014                                                                                                             |

<sup>A</sup> See Fedrigo et al. [66] for further details

DBH, Diameter at Breast Height (1.3 m) Over Bark

Modified from Kasel et al. [63] supplementary Appendix 2.

Table S2. SIMPER analysis on presence and absence records of tree, shrub, and tree fern species across 71 field plots in rainforest, ecotone and eucalypt stands (average similarity within stand types in brackets). Bold species occur in both the field floristics and ecological vegetation class species list for similar stand types.

| Species by stand type                 | Av. Abund. | Av. Sim. | Sim/SD | Contrib. % | Cum.% |
|---------------------------------------|------------|----------|--------|------------|-------|
| Rainforest (45.8)                     |            |          |        |            |       |
| <i>Nothofagus cunninghamii</i>        | 1.00       | 13.11    | 3.49   | 28.6       | 28.6  |
| <i>Dicksonia antarctica</i>           | 0.91       | 10.94    | 1.78   | 23.9       | 52.5  |
| <i>Atherosperma moschatum</i>         | 0.82       | 8.49     | 1.25   | 18.5       | 71.0  |
| <i>Pittosporum bicolor</i>            | 0.55       | 3.20     | 0.61   | 7.0        | 78.0  |
| <i>Eucalyptus regnans</i>             | 0.45       | 2.09     | 0.47   | 4.6        | 82.6  |
| <i>Hedycarya angustifolia</i>         | 0.41       | 1.56     | 0.43   | 3.4        | 86.0  |
| <i>Tasmannia lanceolata</i>           | 0.32       | 1.14     | 0.31   | 2.5        | 88.5  |
| Ecotone (46.3)                        |            |          |        |            |       |
| <i>Dicksonia antarctica</i>           | 1.00       | 11.43    | 4.70   | 24.7       | 24.7  |
| <i>Nothofagus cunninghamii</i>        | 0.93       | 10.04    | 2.13   | 21.7       | 46.3  |
| <i>Acacia dealbata</i>                | 0.86       | 8.25     | 1.51   | 17.8       | 64.1  |
| <i>Eucalyptus regnans</i>             | 0.79       | 6.98     | 1.16   | 15.1       | 79.2  |
| <i>Olearia phlogopappa</i>            | 0.36       | 1.17     | 0.35   | 2.5        | 81.7  |
| <i>Lomatia fraseri</i>                | 0.36       | 1.16     | 0.34   | 2.5        | 84.2  |
| <i>Tasmannia lanceolata</i>           | 0.36       | 1.07     | 0.34   | 2.3        | 86.5  |
| <i>Correa lawrenceana</i>             | 0.36       | 0.94     | 0.35   | 2.0        | 88.6  |
| Eucalypt (37.7)                       |            |          |        |            |       |
| <i>Dicksonia antarctica</i>           | 0.89       | 7.69     | 1.69   | 20.4       | 20.4  |
| <i>Eucalyptus regnans</i>             | 0.89       | 7.57     | 1.70   | 20.1       | 40.4  |
| <i>Correa lawrenceana</i>             | 0.60       | 3.03     | 0.72   | 8.0        | 48.5  |
| <i>Polyscias sambucifolia</i>         | 0.54       | 2.74     | 0.60   | 7.3        | 55.7  |
| <i>Cyathea australis</i>              | 0.54       | 2.35     | 0.62   | 6.2        | 61.9  |
| <i>Olearia phlogopappa</i>            | 0.49       | 2.21     | 0.52   | 5.9        | 67.8  |
| <i>Acacia dealbata</i>                | 0.43       | 1.60     | 0.44   | 4.3        | 72.0  |
| <i>Prostanthera lasianthos</i>        | 0.34       | 1.06     | 0.34   | 2.8        | 74.9  |
| <i>Acacia frigescens</i> <sup>A</sup> | 0.31       | 0.98     | 0.32   | 2.6        | 77.4  |
| <i>Coprosma quadrifida</i>            | 0.34       | 0.92     | 0.34   | 2.4        | 79.9  |
| <i>Tasmannia lanceolata</i>           | 0.31       | 0.83     | 0.31   | 2.2        | 82.1  |
| <i>Cassinia aculeata</i>              | 0.29       | 0.79     | 0.27   | 2.1        | 84.2  |
| <i>Pimelea axiflora</i>               | 0.29       | 0.75     | 0.28   | 2.0        | 86.2  |
| <i>Pomaderris aspera</i>              | 0.31       | 0.72     | 0.31   | 1.9        | 88.1  |
| <i>Hedycarya angustifolia</i>         | 0.31       | 0.68     | 0.31   | 1.8        | 89.9  |

Av. Abund., average abundance; Av. Sim., average similarity; Sim/SD, average similarity/standard deviation; Contrib. %, percent contribution; Cum. %, cumulative percent. See Table S3 for SIMPER analysis.

<sup>A</sup> Absent from the ecological vegetation class (EVC) species list in similar stand types across the study area.

Table S3: SIMPER analysis among rainforest, ecotone, and eucalypt stands based on presence and absence records of tree, shrub, and tree fern species across 71 field plots. Bold species were used to separate stand types based on an abundance value < 0.2 in at least one stand type.

| Species by stand type                 | Av. Abund. | Av. Abund. | Av. Diss. | Diss/SD | Contrib. % | Cum. % |
|---------------------------------------|------------|------------|-----------|---------|------------|--------|
|                                       | Rainforest | Ecotone    |           |         |            |        |
| <i>Acacia dealbata</i>                | 0.09       | 0.86       | 4.92      | 1.72    | 7.87       | 7.87   |
| <b><i>Atherosperma moschatum</i></b>  | 0.82       | 0.07       | 4.66      | 1.62    | 7.45       | 15.32  |
| <i>Eucalyptus regnans</i>             | 0.45       | 0.79       | 3.37      | 0.99    | 5.40       | 20.72  |
| <b><i>Pittosporum bicolor</i></b>     | 0.55       | 0.14       | 3.08      | 1.02    | 4.92       | 25.63  |
| <i>Tasmannia lanceolata</i>           | 0.32       | 0.36       | 2.66      | 0.86    | 4.26       | 29.89  |
| <i>Lomatia fraseri</i>                | 0.18       | 0.36       | 2.40      | 0.79    | 3.84       | 33.73  |
|                                       | Rainforest | Eucalypt   |           |         |            |        |
| <b><i>Nothofagus cunninghamii</i></b> | 1.00       | 0.09       | 5.20      | 2.44    | 7.16       | 7.16   |
| <b><i>Atherosperma moschatum</i></b>  | 0.82       | 0.03       | 4.57      | 1.74    | 6.29       | 13.45  |
| <i>Eucalyptus regnans</i>             | 0.45       | 0.89       | 3.20      | 1.01    | 4.40       | 17.85  |
| <i>Correa lawrenceana</i>             | 0.14       | 0.60       | 3.04      | 1.10    | 4.19       | 22.04  |
| <i>Polyscias sambucifolia</i>         | 0.23       | 0.54       | 2.95      | 0.97    | 4.06       | 26.10  |
| <i>Pittosporum bicolor</i>            | 0.55       | 0.23       | 2.87      | 1.00    | 3.95       | 30.04  |
|                                       | Ecotone    | Eucalypt   |           |         |            |        |
| <b><i>Nothofagus cunninghamii</i></b> | 0.93       | 0.09       | 4.63      | 2.08    | 7.28       | 7.28   |
| <i>Acacia dealbata</i>                | 0.86       | 0.43       | 3.04      | 1.06    | 4.78       | 12.06  |
| <i>Correa lawrenceana</i>             | 0.36       | 0.60       | 2.76      | 1.02    | 4.35       | 16.41  |
| <i>Polyscias sambucifolia</i>         | 0.29       | 0.54       | 2.75      | 0.98    | 4.33       | 20.74  |
| <i>Olearia phlogopappa</i>            | 0.36       | 0.49       | 2.64      | 0.94    | 4.16       | 24.90  |
| <i>Cyathea australis</i>              | 0.21       | 0.54       | 2.61      | 1.02    | 4.10       | 29.00  |

Av. Abund., average abundance; Av. Diss., average dissimilarity; Diss/SD, average dissimilarity/standard deviation; Contrib. %, percent contribution; Cum. %, cumulative percent.

Table S4: Spatially and temporally pooled cross validated error statistics for mean monthly (1981–2010) precipitation and vapor pressure across Victoria interpolated using ordinary trivariate splines.

| Mean Monthly (1981-2010) | $r^2$ | MAE               | RMSE              | RSR  | BIAS               |
|--------------------------|-------|-------------------|-------------------|------|--------------------|
| Precipitation (mm)       | 0.92  | 4.65 <sup>A</sup> | 7.65 <sup>B</sup> | 0.28 | -0.19 <sup>C</sup> |
| Vapor Pressure (hPa)     | 0.97  | 0.29              | 0.38              | 0.17 | 0.00               |

$r^2$  = coefficient of determination, MAE = mean absolute error, RMSE = root mean square error, RSR = ratio of the RMSE to the standard deviation of the observations, BIAS = mean error.

<sup>A</sup> Precipitation MAE of 8.5% when expressed as a proportion of the mean.

<sup>B</sup> Precipitation RMSE of 14.0% when expressed as a proportion of the mean.

<sup>C</sup> Precipitation BIAS of -0.00% when expressed as a proportion of the mean.

Table S5: Correlation matrix of variables considered for species distribution modelling across the study region.

Correlation matrix of candidate predictor variables used for species distribution modelling and subsequent predictive ecosystem mapping

Bolded variables were used in the final analysis

|                     | FracBare | FracGreen | FracNonGreen | Elevation | Slope  | TPI    | PDIR   | HLI    | Waterdist | BIO1   | BIO2   | BIO3   | BIO4   | BIO5   | BIO6   | BIO7   | BIO8   | BIO9   | BIO10  | BIO11  | BIO12  | BIO13  | BIO14  | BIO15  | BIO16  | BIO17  | BIO18  | BIO19  | Ann_VPD | Sum_VPD | AHMI   |       |
|---------------------|----------|-----------|--------------|-----------|--------|--------|--------|--------|-----------|--------|--------|--------|--------|--------|--------|--------|--------|--------|--------|--------|--------|--------|--------|--------|--------|--------|--------|--------|---------|---------|--------|-------|
| <b>FracBare</b>     | 1.000    | -0.712    | 0.560        | -0.246    | 0.097  | 0.099  | 0.170  | 0.112  | 0.173     | 0.246  | 0.347  | 0.273  | 0.132  | 0.237  | 0.169  | 0.383  | 0.233  | 0.240  | 0.267  | 0.223  | -0.280 | -0.236 | -0.254 | -0.036 | -0.242 | -0.280 | -0.256 | -0.241 | 0.263   | 0.285   | 0.314  |       |
| FracGreen           | -0.712   | 1.000     | -0.380       | 0.312     | -0.068 | -0.091 | -0.276 | -0.130 | -0.261    | -0.301 | -0.428 | -0.322 | -0.228 | -0.379 | -0.219 | -0.485 | -0.249 | -0.305 | -0.336 | -0.266 | 0.404  | 0.332  | 0.386  | 0.005  | 0.334  | 0.398  | 0.371  | 0.357  | -0.371  | -0.419  | -0.465 |       |
| <b>FracNonGreen</b> | 0.560    | -0.380    | 1.000        | -0.301    | 0.054  | 0.083  | 0.275  | 0.119  | 0.259     | 0.289  | 0.406  | 0.303  | 0.228  | 0.365  | 0.215  | 0.462  | 0.230  | 0.295  | 0.324  | 0.255  | -0.400 | -0.328 | -0.384 | 0.002  | -0.328 | -0.392 | -0.367 | -0.355 | 0.366   | 0.415   | 0.461  |       |
| Elevation           | -0.246   | 0.312     | -0.301       | 1.000     | -0.065 | -0.057 | -0.116 | 0.007  | -0.130    | -0.977 | -0.880 | -0.904 | 0.248  | -0.957 | -0.930 | -0.733 | -0.876 | -0.961 | -0.960 | -0.979 | 0.913  | 0.901  | 0.861  | 0.452  | 0.899  | 0.896  | 0.885  | 0.832  | -0.905  | -0.829  | -0.885 |       |
| Slope               | 0.097    | -0.068    | 0.054        | -0.065    | 1.000  | 0.017  | -0.309 | -0.466 | -0.002    | 0.131  | 0.063  | 0.072  | -0.037 | 0.116  | 0.139  | 0.054  | 0.089  | 0.115  | 0.129  | 0.132  | -0.091 | -0.091 | -0.081 | 0.017  | -0.085 | -0.098 | -0.097 | -0.065 | 0.146   | 0.111   | 0.062  |       |
| TPI                 | 0.099    | -0.091    | 0.083        | -0.057    | 0.017  | 1.000  | 0.142  | 0.085  | 0.132     | 0.148  | 0.000  | -0.015 | -0.037 | 0.111  | 0.140  | 0.191  | 0.036  | 0.075  | 0.169  | 0.166  | 0.133  | -0.147 | -0.115 | -0.191 | 0.046  | -0.118 | -0.187 | -0.214 | -0.075  | 0.193   | 0.208  | 0.137 |
| PDIR                | 0.170    | -0.276    | 0.275        | -0.116    | -0.309 | 0.142  | 1.000  | 0.733  | 0.116     | 0.115  | 0.136  | 0.100  | 0.112  | 0.143  | 0.094  | 0.167  | 0.082  | 0.138  | 0.131  | 0.098  | -0.125 | -0.093 | -0.149 | 0.027  | -0.097 | -0.143 | -0.140 | -0.088 | 0.136   | 0.162   | 0.129  |       |
| HLI                 | 0.112    | -0.130    | 0.119        | 0.007     | -0.466 | 0.085  | 0.733  | 1.000  | 0.094     | -0.034 | 0.016  | -0.025 | 0.139  | -0.002 | -0.053 | 0.065  | -0.014 | -0.002 | -0.018 | -0.050 | 0.000  | 0.029  | -0.021 | 0.044  | 0.020  | -0.012 | -0.015 | 0.017  | -0.019  | 0.030   | 0.021  |       |
| <b>Waterdist</b>    | 0.173    | -0.261    | 0.259        | -0.130    | -0.002 | 0.132  | 0.116  | 0.094  | 1.000     | 0.194  | 0.016  | -0.034 | 0.239  | 0.207  | 0.249  | 0.096  | 0.046  | 0.216  | 0.229  | 0.162  | -0.335 | -0.296 | -0.345 | -0.028 | -0.300 | -0.348 | -0.364 | -0.259 | 0.311   | 0.365   | 0.327  |       |
| BIO1                | 0.246    | -0.301    | 0.289        | -0.977    | 0.131  | 0.148  | 0.115  | -0.034 | 0.194     | 1.000  | 0.840  | 0.849  | -0.177 | 0.979  | 0.970  | 0.726  | 0.853  | 0.989  | 0.993  | 0.993  | -0.933 | -0.910 | -0.911 | -0.389 | -0.907 | -0.940 | -0.932 | -0.820 | 0.960   | 0.892   | 0.896  |       |
| BIO2                | 0.347    | -0.428    | 0.406        | -0.880    | 0.063  | 0.000  | 0.136  | 0.016  | 0.016     | 0.840  | 1.000  | 0.950  | -0.064 | 0.897  | 0.694  | 0.918  | 0.723  | 0.831  | 0.843  | 0.823  | -0.748 | -0.708 | -0.750 | -0.231 | -0.708 | -0.769 | -0.730 | -0.643 | 0.749   | 0.728   | 0.741  |       |
| BIO3                | 0.273    | -0.322    | 0.303        | -0.904    | 0.072  | -0.015 | 0.100  | -0.025 | -0.034    | 0.849  | 0.950  | 1.000  | -0.359 | 0.848  | 0.746  | 0.751  | 0.840  | 0.819  | 0.816  | 0.867  | -0.767 | -0.778 | -0.663 | -0.483 | -0.778 | -0.713 | -0.690 | -0.751 | 0.706   | 0.618   | 0.750  |       |
| <b>BIO4</b>         | 0.132    | -0.228    | 0.228        | 0.248     | -0.037 | 0.111  | 0.112  | 0.139  | 0.239     | -0.177 | -0.064 | -0.359 | 1.000  | -0.008 | -0.266 | 0.329  | -0.537 | -0.098 | -0.057 | -0.291 | 0.178  | 0.335  | -0.168 | 0.827  | 0.333  | -0.062 | -0.038 | 0.455  | 0.013   | 0.248   | -0.143 |       |
| BIO5                | 0.237    | -0.379    | 0.365        | -0.957    | 0.116  | 0.140  | 0.143  | -0.002 | 0.207     | 0.979  | 0.897  | 0.848  | -0.008 | 1.000  | 0.911  | 0.845  | 0.776  | 0.980  | 0.992  | 0.952  | -0.906 | -0.853 | -0.941 | -0.242 | -0.851 | -0.953 | -0.934 | -0.748 | 0.958   | 0.933   | 0.878  |       |
| BIO6                | 0.169    | -0.219    | 0.215        | -0.930    | 0.139  | 0.191  | 0.094  | -0.053 | 0.249     | 0.970  | 0.694  | 0.746  | -0.266 | 0.911  | 1.000  | 0.550  | 0.847  | 0.955  | 0.952  | 0.975  | -0.932 | -0.927 | -0.875 | -0.475 | -0.924 | -0.913 | -0.920 | -0.848 | 0.947   | 0.854   | 0.887  |       |
| <b>BIO7</b>         | 0.383    | -0.485    | 0.462        | -0.733    | 0.054  | 0.036  | 0.167  | 0.065  | 0.096     | 0.726  | 0.918  | 0.751  | 0.329  | 0.845  | 0.550  | 1.000  | 0.474  | 0.748  | 0.775  | 0.665  | -0.628 | -0.527 | -0.774 | 0.125  | -0.527 | -0.748 | -0.701 | -0.416 | 0.713   | 0.853   | 0.630  |       |
| BIO8                | 0.233    | -0.249    | 0.230        | -0.876    | 0.089  | 0.075  | 0.082  | -0.014 | 0.046     | 0.853  | 0.723  | 0.840  | -0.537 | 0.776  | 0.847  | 0.474  | 1.000  | 0.805  | 0.800  | 0.893  | -0.828 | -0.860 | -0.626 | -0.676 | -0.863 | -0.711 | -0.710 | -0.879 | 0.744   | 0.597   | 0.817  |       |
| BIO9                | 0.240    | -0.305    | 0.235        | -0.961    | 0.115  | 0.169  | 0.138  | -0.002 | 0.216     | 0.989  | 0.831  | 0.819  | -0.098 | 0.980  | 0.955  | 0.748  | 0.805  | 1.000  | 0.991  | 0.973  | -0.918 | -0.880 | -0.933 | -0.319 | -0.878 | -0.951 | -0.946 | -0.775 | 0.958   | 0.910   | 0.876  |       |
| BIO10               | 0.267    | -0.336    | 0.324        | -0.960    | 0.129  | 0.166  | 0.131  | -0.018 | 0.229     | 0.993  | 0.843  | 0.816  | -0.057 | 0.992  | 0.952  | 0.775  | 0.800  | 0.991  | 1.000  | 0.972  | -0.927 | -0.884 | -0.945 | -0.296 | -0.881 | -0.962 | -0.951 | -0.779 | 0.976   | 0.836   | 0.894  |       |
| BIO11               | 0.223    | -0.266    | 0.255        | -0.979    | 0.132  | 0.133  | 0.098  | -0.050 | 0.169     | 0.993  | 0.823  | 0.867  | -0.291 | 0.952  | 0.975  | 0.665  | 0.893  | 0.973  | 0.972  | 1.000  | -0.930 | -0.926 | -0.866 | -0.478 | -0.923 | -0.907 | -0.903 | -0.854 | 0.932   | 0.838   | 0.890  |       |
| BIO12               | -0.280   | 0.404     | -0.400       | 0.913     | -0.091 | -0.147 | -0.125 | 0.000  | -0.335    | -0.933 | -0.748 | -0.767 | 0.178  | -0.906 | -0.932 | -0.628 | -0.828 | -0.918 | -0.927 | -0.930 | 1.000  | 0.982  | 0.907  | 0.504  | 0.983  | 0.955  | 0.951  | 0.935  | -0.931  | -0.866  | -0.982 |       |
| BIO13               | -0.236   | 0.332     | -0.328       | 0.901     | -0.091 | -0.115 | -0.093 | 0.029  | -0.296    | -0.910 | -0.708 | -0.778 | 0.335  | -0.853 | -0.927 | -0.527 | -0.860 | -0.880 | -0.884 | -0.926 | 0.982  | 1.000  | 0.829  | 0.639  | 0.998  | 0.894  | 0.894  | 0.972  | -0.879  | -0.779  | -0.958 |       |
| BIO14               | -0.254   | 0.386     | -0.384       | 0.861     | -0.081 | -0.191 | -0.149 | -0.021 | -0.345    | -0.911 | -0.750 | -0.663 | -0.168 | -0.941 | -0.875 | -0.774 | -0.626 | -0.933 | -0.945 | -0.866 | 0.907  | 0.829  | 1.000  | 0.129  | 0.828  | 0.968  | 0.978  | 0.704  | -0.957  | -0.971  | -0.876 |       |
| BIO15               | -0.036   | 0.005     | 0.002        | 0.452     | 0.017  | 0.046  | 0.027  | 0.044  | -0.028    | -0.389 | -0.231 | -0.483 | 0.827  | -0.242 | -0.475 | 0.125  | -0.863 | -0.319 | -0.296 | -0.478 | 0.504  | 0.639  | 0.129  | 1.000  | 0.647  | 0.250  | 0.274  | 0.749  | -0.253  | -0.059  | -0.506 |       |
| BIO16               | -0.242   | 0.334     | -0.328       | 0.899     | -0.085 | -0.118 | -0.097 | 0.020  | -0.300    | -0.907 | -0.708 | -0.778 | 0.333  | -0.851 | -0.924 | -0.527 | -0.863 | -0.881 | -0.923 | 0.983  | 0.936  | 0.828  | 0.647  | 1.000  | 0.894  | 0.896  | 0.973  | -0.874 | -0.774  | -0.960  |        |       |
| BIO17               | -0.280   | 0.398     | -0.392       | 0.896     | -0.098 | -0.187 | -0.143 | -0.012 | -0.348    | -0.940 | -0.769 | -0.713 | -0.062 | -0.953 | -0.913 | -0.748 | -0.711 | -0.951 | -0.962 | -0.907 | 0.955  | 0.894  | 0.988  | 0.250  | 0.894  | 1.000  | 0.932  | 0.789  | -0.968  | -0.957  | -0.926 |       |
| BIO18               | -0.258   | 0.371     | -0.367       | 0.885     | -0.097 | -0.214 | -0.140 | -0.015 | -0.364    | -0.932 | -0.730 | -0.690 | -0.038 | -0.934 | -0.920 | -0.701 | -0.710 | -0.946 | -0.951 | -0.903 | 0.951  | 0.894  | 0.978  | 0.274  | 0.896  | 0.992  | 1.000  | 0.790  | -0.959  | -0.943  | -0.919 |       |
| BIO19               | -0.241   | 0.357     | -0.355       | 0.832     | -0.065 | -0.075 | -0.088 | 0.017  | -0.259    | -0.820 | -0.643 | -0.751 | 0.455  | -0.748 | -0.848 | -0.416 | -0.879 | -0.775 | -0.779 | -0.854 | 0.935  | 0.972  | 0.704  | 0.749  | 0.973  | 0.789  | 0.790  | 1.000  | -0.778  | -0.653  | -0.932 |       |
| Ann_VPD             | 0.263    | -0.371    | 0.366        | -0.905    | 0.146  | 0.193  | 0.136  | -0.019 | 0.311     | 0.960  | 0.749  | 0.706  | 0.013  | 0.958  | 0.947  | 0.713  | 0.744  | 0.958  | 0.976  | 0.932  | -0.931 | -0.879 | -0.957 | -0.253 | -0.874 | -0.968 | -0.953 | -0.778 | 1.000   | 0.969   | 0.909  |       |
| Sum_VPD             | 0.285    | -0.419    | 0.415        | -0.823    | 0.111  | 0.208  | 0.162  | 0.030  | 0.365     | 0.892  | 0.728  | 0.618  | 0.248  | 0.933  | 0.854  | 0.783  | 0.597  | 0.910  | 0.936  | 0.838  | -0.866 | -0.779 | -0.971 | -0.059 | -0.774 | -0.957 | -0.943 | -0.653 | 0.969   | 1.000   | 0.856  |       |
| <b>AHMI</b>         | 0.314    | -0.465    | 0.461        | -0.885    | 0.062  | 0.137  | 0.129  | 0.021  | 0.327     | 0.896  | 0.741  | 0.750  | -0.143 | 0.878  | 0.887  | 0.630  | 0.817  | 0.876  | 0.894  | 0.830  | -0.982 | -0.958 | -0.876 | -0.506 | -0.960 | -0.926 | -0.919 | -0.932 | 0.909   | 0.856   | 1.000  |       |

Figure S1: Random forest variable importance plots for distribution models of species which characterize rainforest, ecotone and eucalypt stand types.

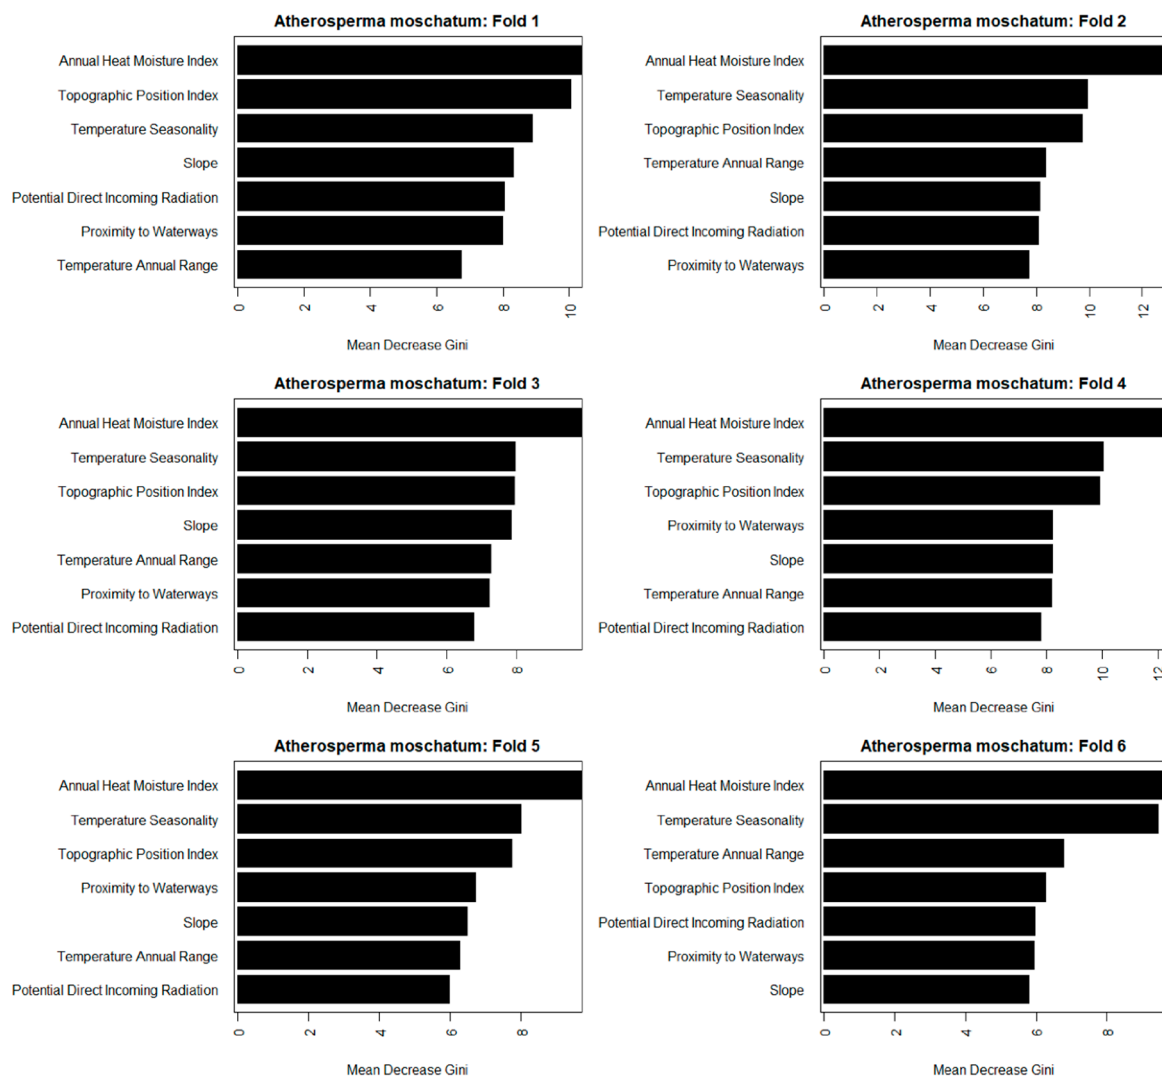

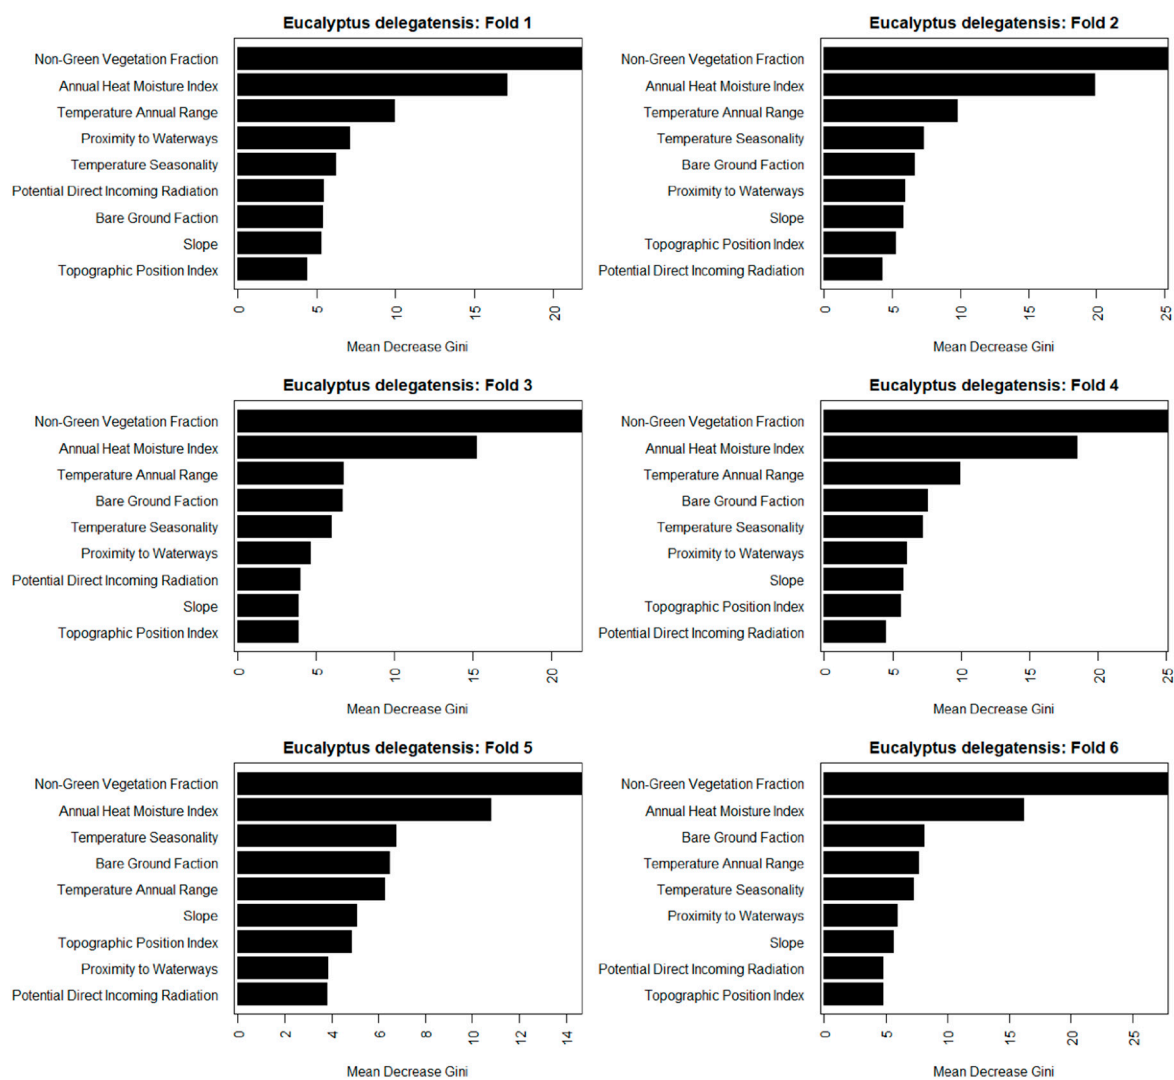

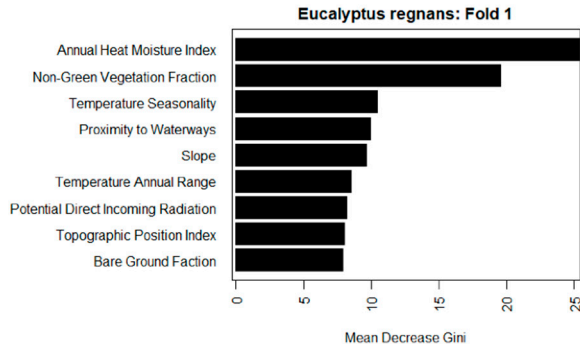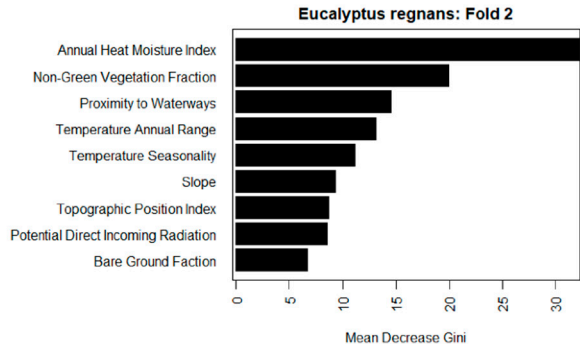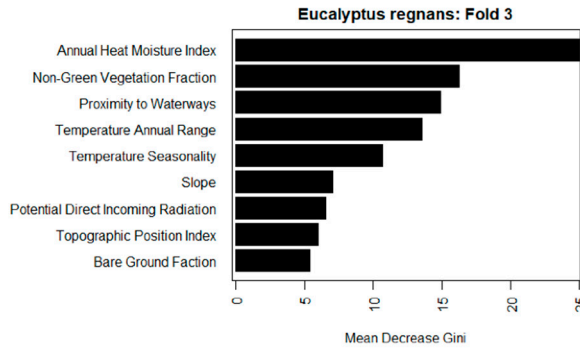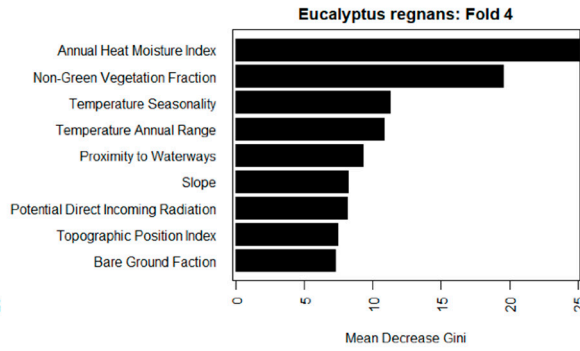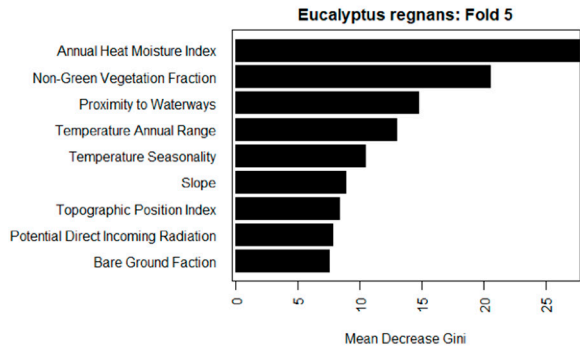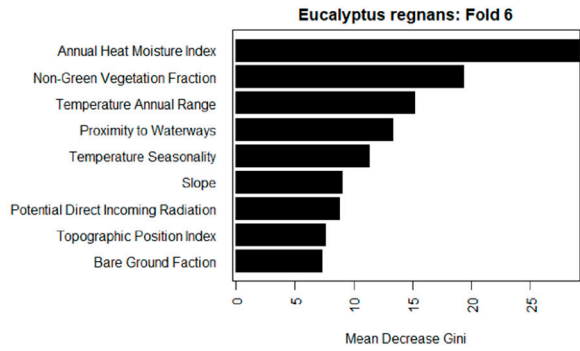



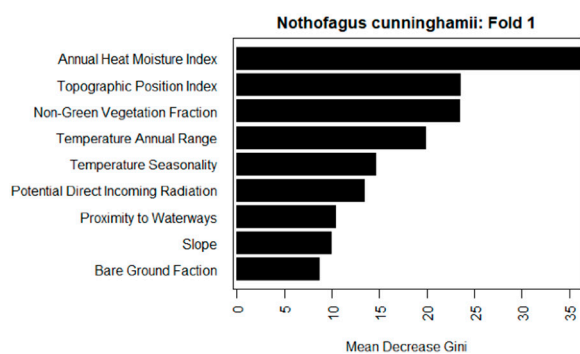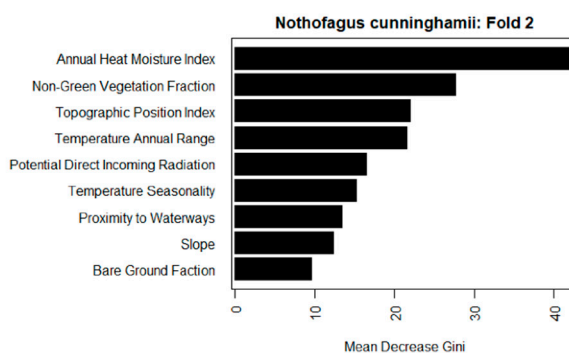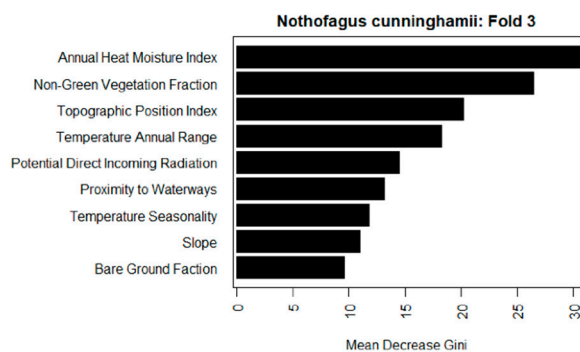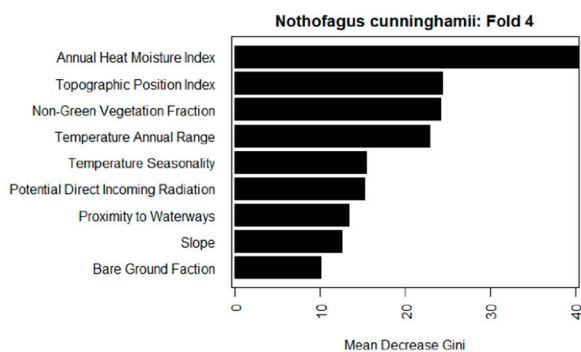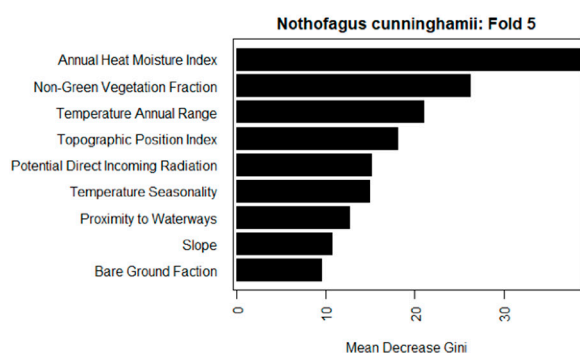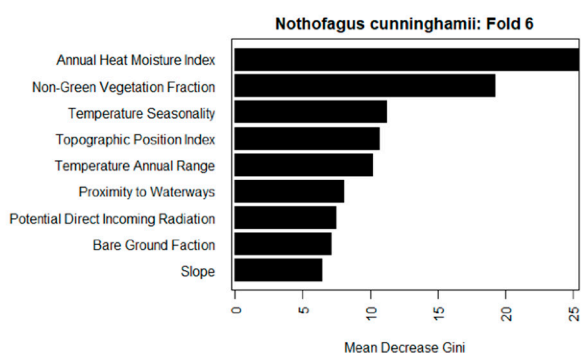

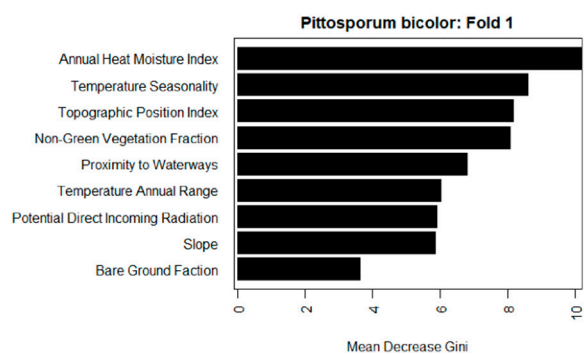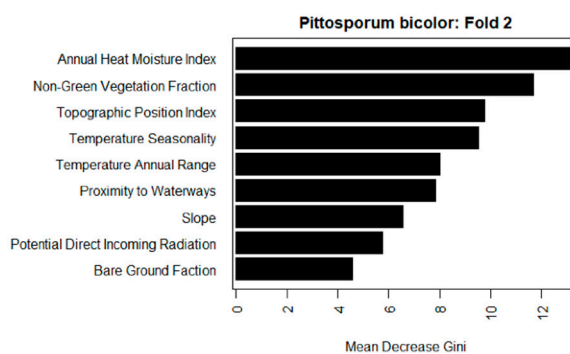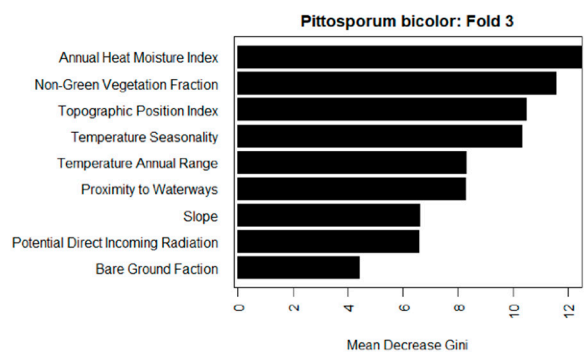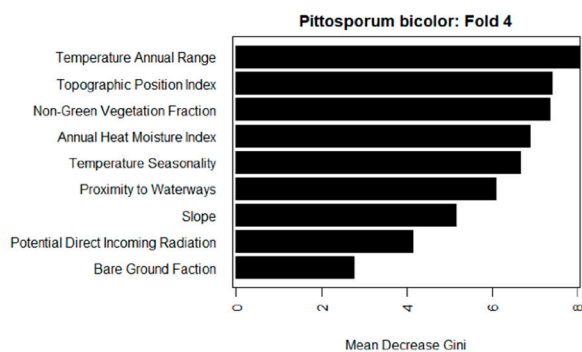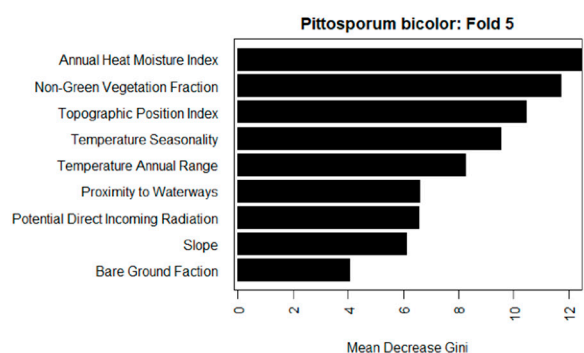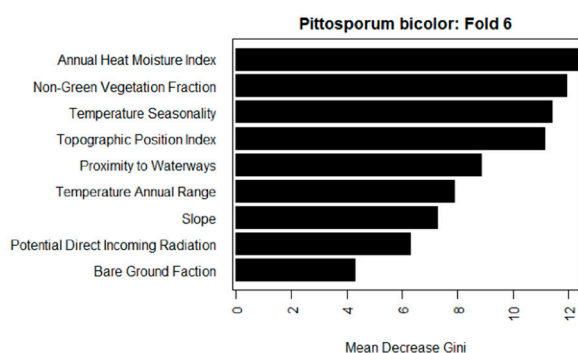

Figure S2: Map of stand type distributions as predicted by the predictive ecosystem mapping model within the lidar footprint acquired across the Central Highlands region.

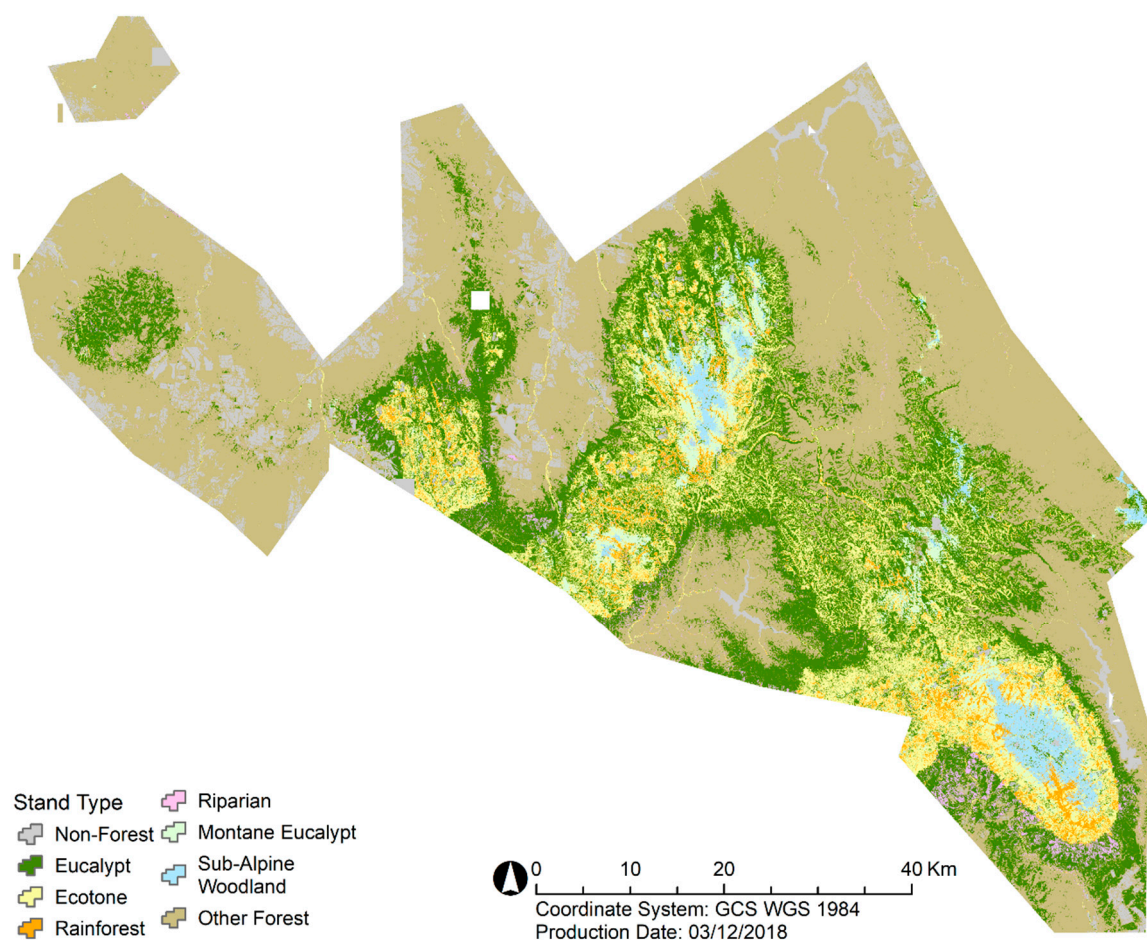

Figure S3: Map of stand type distributions as predicted by the ecological vegetation classes within the lidar footprint acquired across the Central Highlands region.

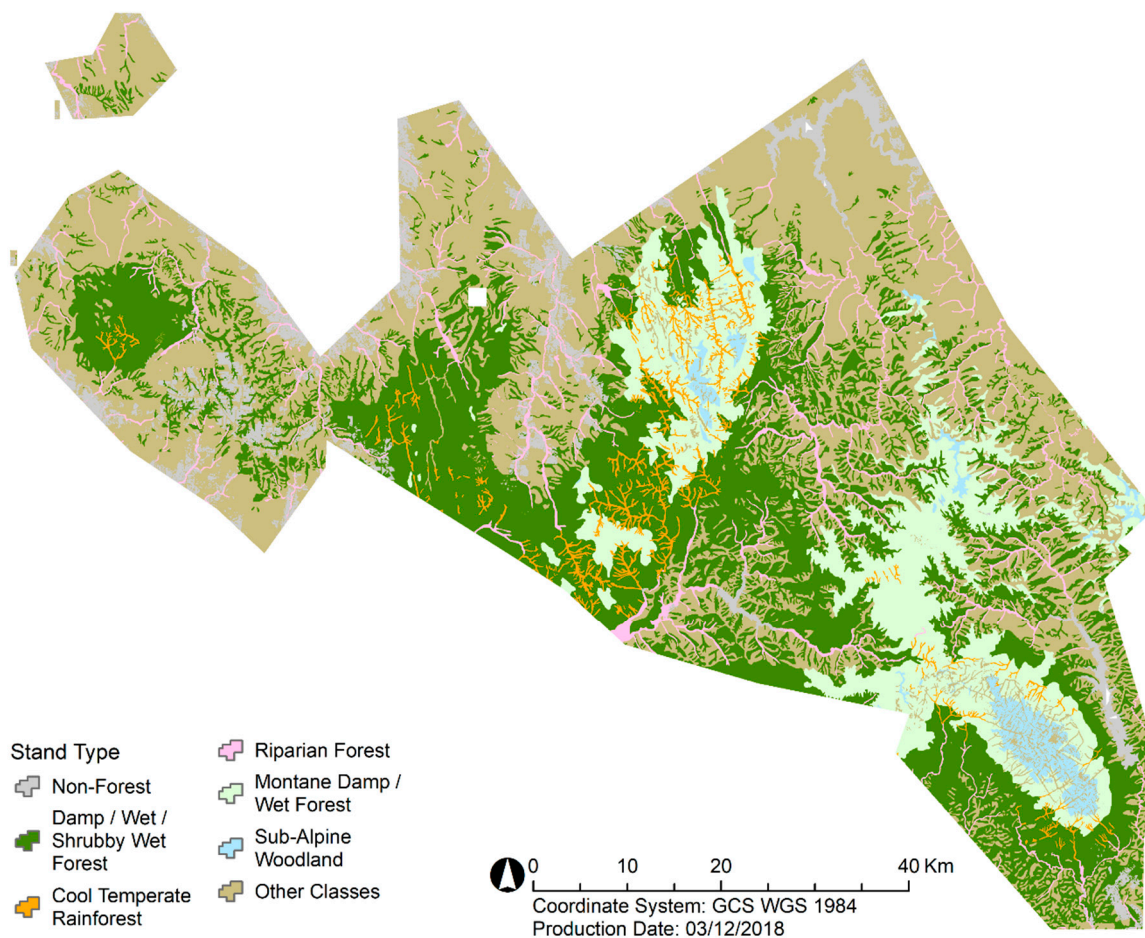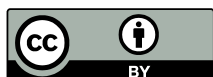

© 2019 by the authors. Submitted for possible open access publication under the terms and conditions of the Creative Commons Attribution (CC BY) license (<http://creativecommons.org/licenses/by/4.0/>).
